# Supplementary material for: RNA-on-X 1 and 2 in Drosophila melanogaster fulfill separate functions in dosage compensation
Source: PubMed Central journal article supplement (PMC6301720; doi:10.1371/journal.pgen.1007842), 2018-12-10
Supplement: pgen.1007842.s001.pdf [file pgen.1007842.s001.pdf]

**S1 Table. PCR primers**

| <b><i>Amplified DNA segment</i></b> | <b><i>Primer sequence</i></b> |
|-------------------------------------|-------------------------------|
| <i>jb</i>                           | gctggcaggaatggactcga          |
|                                     | gctcatttaggcgctcgtgc          |
| <i>whe</i>                          | catcgttgtgctcgccatgg          |
|                                     | gagccctgaagtgggccag           |
| <i>CG12679</i>                      | gctgatggacctcgctctgt          |
|                                     | ggcagccacaccgaagtaga          |
| <i>CR32652</i>                      | ttactggatcgcatcgctg           |
|                                     | gggaccggaagtgtgcagta          |
| <i>CG15306</i>                      | cgcttgggtgaaggtgaagacg        |
|                                     | tcctggtagctttgcccgt           |
| <i>TrxT</i>                         | gcagcagtactcggaccgt           |
|                                     | gccgcccttgatgaacacaa          |
| <i>CG2574</i>                       | ccagtcacagtgcacgga            |
|                                     | gtgcaattcgggtggcggatt         |
| <i>CG11106</i>                      | tgctctcaattccgggagcc          |
|                                     | ctccagatccaccgccgtag          |
| <i>Gbeta13F</i>                     | gtccatgccattcactgcg           |
|                                     | cacatggtgtcgaggccacc          |
| <i>I(1)G0004</i>                    | aacctaactcctcggctcgcc         |
|                                     | gctctcccaatcacatgcgc          |
| <i>UbcE2H</i>                       | aggtggccgactatgtgcag          |
|                                     | ccctggcctcatcctcactg          |

|                           |                         |
|---------------------------|-------------------------|
| <i>roX1_1</i>             | acgaggtatggcatttcct     |
|                           | tggccaccttatagagataaccc |
| <i>roX1_2</i>             | ctttgggattgctgcacgat    |
|                           | gacaagtggcagccctaatg    |
| <i>RpS3</i>               | cattgagttgtacgccgaga    |
|                           | gaatggatcatcaggccatc    |
| <i>RpL32</i>              | cgatgttgggcatcagatac    |
|                           | cccaagatcgtgaagaagc     |
| <i>roX2</i> genomic locus | gccgctggaggcaaggatatgag |
|                           | cagaactctgttaatgcg      |
