# Supplementary material for: RNA-on-X 1 and 2 in Drosophila melanogaster fulfill separate functions in dosage compensation
Source: PubMed Central journal article supplement (PMC6301720; doi:10.1371/journal.pgen.1007842), 2018-12-10
Supplement: pgen.1007842.s005.pdf [file pgen.1007842.s005.pdf]

4-2

ACATAAAACACATTTAATTCGAAATAAGTTTGGGTATTATTAGCTTATAATATTCAAAAGTGTATTTT  
 GCAATTGGAACGAATTTGGAATCCCGCTATTTTCGGATTCATGCAGTTCCCATTATATTTTATTTCGGT  
 ATTGGAATCCCGCTATTTTCGCATTCATGCAGTTCCCCTATATTTTATTTCGGTATTTTCGCAGTCAT  
 TAGTGTGGCCAAAACTCGAAAATATCAAGGGCTAGAGCAGCTAGATGTTGCGGCATTTCGCGCCTGGT  
 CACACTAAGCTAGGGCTACTTTTTATATCATAAGTCGAGCGTTTAGGTAAGCGAAACAAAAAGAGCTT  
 TAGTTAGAGGTATTAGTTTGGTTGCTATTATTTCTAAATTGAAAACCTTCACTTCCTTTGATCCAAAAG  
 ACACTGAAAAGACACGTTTGCAGTTGAGTTCATTATTTTCTGGTATACATACACTGATTACTCATT  
 CAATTGGCATTTCCTGCTTTCTCCGATTGCCTTGCCTCGCATAAATTTAACACAAAAAAGAA  
 GTTCGGGGTGTTTAGAATCCATCCACTTGGTACAGTTCCCATCGAGCTGGTGAGTACTCCGCGCAGTG  
 CAACGTATACACACTTGAACTCGAATCTGGCAGCAAATGGTGGTGACCTATTAATAACACCCGCTC  
 AATTTTC- [ $\Delta 876$ bp] -TCCAGGGTGACCAGAAGTGCACCTTAAATTACATATGACAAATAAAGACTT  
 ATCTGCTATTGCAAATACTGTTTTAAGCGGCTTTTTTCCATCAAATTTGTTAGTTCCTGTTCTGTT  
 TTAATAAGTTGGCAATACCGATCCTCCGCACTTGCTATGTGTGTCTATAATCATATAGGGTGGCAGCG  
 CAGGCCAGGGCTGGCAAGGGTGGCGCATTAAACAGAGTTCTG

8-5

ACATAAAACACATTTAATTCGAAATAAGTTTGGGTATTATTAGCTTATAATATTCAAAAGTGTATTTT  
 GCAATTGGAACGAATTTGGAATCCCGCTATTTTCGGATTCATGCAGTTCCCATTATATTTTATTTCGGT  
 ATTGGAATCCCGCTATTTTCGCATTCATGCAGTTCCCCTATATTTTATTTCGGTATTTTCGCAGTCAT  
 TAGTGT- [ $\Delta 1416$ bp] -AGCGCAGGCCAGGGCTGGCAAGGGTGGCGCATTAAACAGAGTTCTG

9-4

ACATAAAACACATTTAATTCGAAATAAGTTTGGGTATTATTAGCTTATAATATTCAAAAGTGTATTTT  
 GCAATTGGAACGAATTTGGAATCCCGCTATTTTCGGATTCATGCAGTTCCCATTATATTTTATTTCGGT  
 ATTGGAATCCCGCTATTTTCGCATTCATGCAGTTCCCCTATATTTTATTTCGGTATTTTCGCAGTCAT  
 TAGTGTGGCCAAAACTCGAAAATATCAAGGGCTAGAGCAGCTAGAT- [ $\Delta 1313$ bp] -TCCAGGGTGAC  
 CAGAACTGACACTTAAATTACATATGACAAATAAAGACTTATCTGCTATTGCAAATACTGTTTTAAGC  
 GGCTTTTTTCCATCAAATTTGTTAGTTCCTGTTCTGTTTAAATAAGTTGGCAATACCGATCCTCCG  
 CACTTGCTATGTGTGTCTATAATCATATAGGGTGGCAGCGCAGGCCAGGGCTGGCAAGGGTGGCGCAT  
 TAACAGAGTTCTG

15-6

ACATAAAACACA- [ $\Delta 1554$ bp] -AGGGTGACCAGAAGTGCACCTTAAATTACATATGACAAATAAAGA  
 CTTATCTGCTATTGCAAATACTGTTTTAAGCGGCTTTTTTCCATCAAATTTGTTAGTTCCTGTTCT  
 GTTTTAATAAGTTGGCAATACCGATCCTCCGCACTTGCTATGTGTGTCTATAATCATATAGGGTGGCA  
 GCGCAGGCCAGGGCTGGCAAGGGTGGCGCATTAAACAGAGTTCTG
