# Supplementary material for: RNA-on-X 1 and 2 in Drosophila melanogaster fulfill separate functions in dosage compensation
Source: PubMed Central journal article supplement (PMC6301720; doi:10.1371/journal.pgen.1007842), 2018-12-10

Density of gene expression log<sub>2</sub> fold change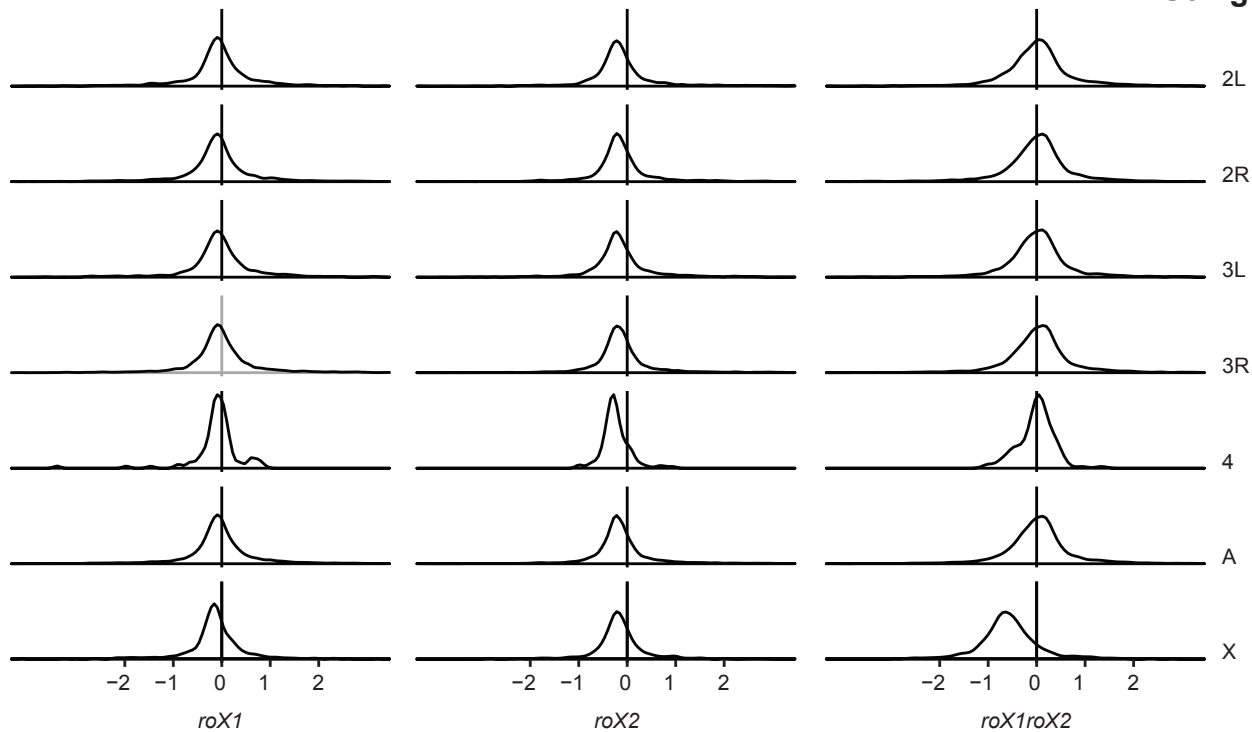

Supplement: pgen.1007842.s006.pdf [file pgen.1007842.s006.pdf]
