# Supplementary material for: RNA-on-X 1 and 2 in Drosophila melanogaster fulfill separate functions in dosage compensation
Source: PubMed Central journal article supplement (PMC6301720; doi:10.1371/journal.pgen.1007842), 2018-12-10

S7 fig

■ roX2 replicate 1   ■ roX2 replicate 2   ■ wt replicate 1   ■ wt replicate 2

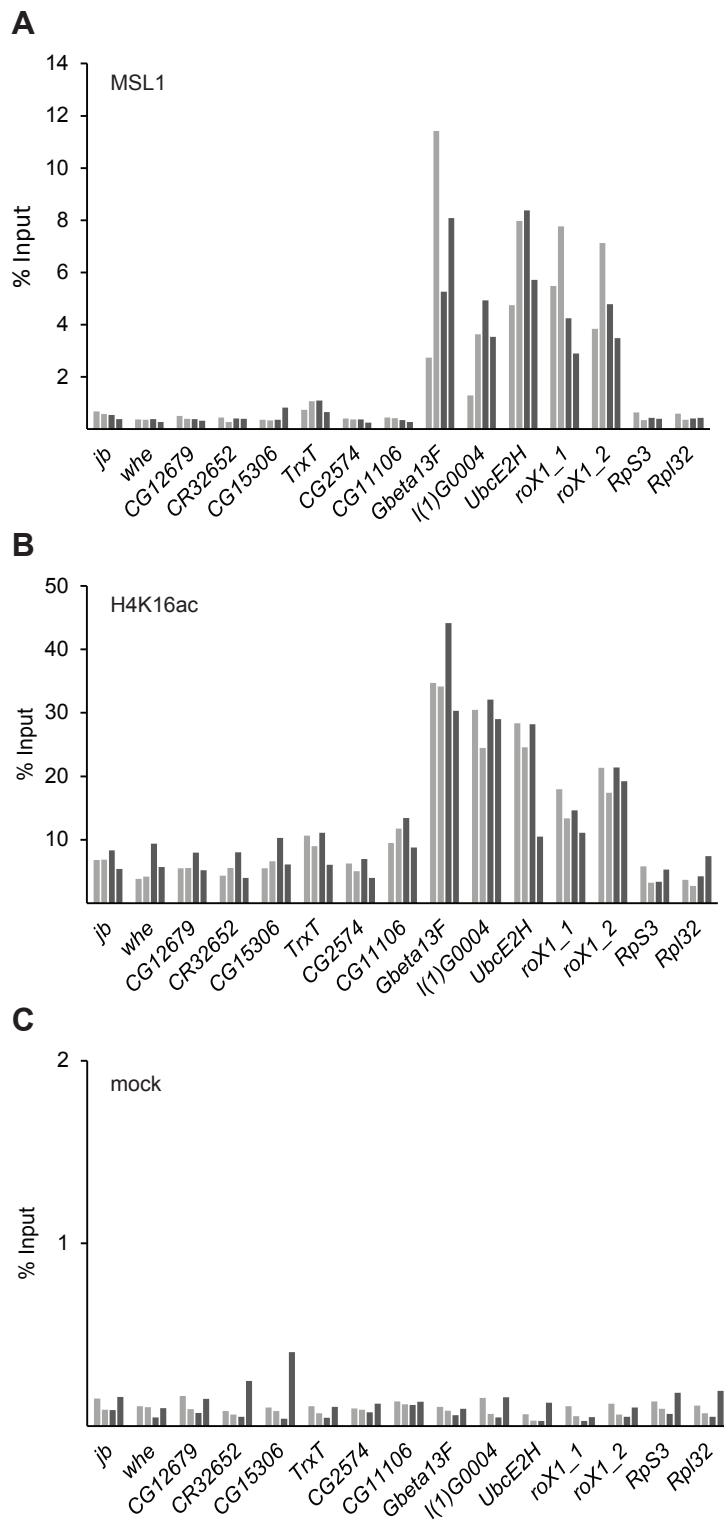

Supplement: pgen.1007842.s010.pdf [file pgen.1007842.s010.pdf]
